# Supplementary material
Source: Research Square preprint supplement (doi:10.21203/rs.3.rs-9666922/v1)
Supplement: Supplementary file 1 [file d0d637de2b8efd7b543d9a74.docx]

**Supplementary Information**

**Process-based quantification of accumulation and interaction-driven synergistic risks of microplastics and heavy metals in freshwater sediments**

Beibei He1,*, Yan Ji1, Jiawen Guo1, Godwin Ayoko2, James McGree3, Raymond Jianxiong Zeng1,* Ashantha Goonetilleke1,4

1 Centre of Wastewater Resource Reuse, College of Resources and Environment, Fujian Agriculture and Forestry University, Fuzhou, Fujian 350002, China.

2 Faculty of Science, School of Chemistry and Physics, Queensland University of Technology (QUT), P.O. Box 2434, Brisbane, Qld 4001, Australia.

3 Faculty of Science, School of Mathematical Sciences, Queensland University of Technology (QUT), P.O. Box 2434, Brisbane, Qld 4001, Australia.

4 Department of Civil Engineering, Birla Institute of Technology and Science, Pilani Campus, Vidya Vihar, Pilani, Rajasthan 333031, India.

*Corresponding author:

Beibei He, beibei.he@fafu.edu.cn

Raymond Jianxiong Zeng, rzeng@ustc.edu.cn

**Text S1**

**1. MPs extraction, identification and quantification**

A sediment sample of 5 g was taken out and added into a pre-cleaned glass breaker using a stainless steel spoon and 50 mL volume of prepared ZnCl2 solution with the density of 1.65 g/mL was carefully poured over the samples using a pipette. An ultrasound bath was used for shaking and stirring to obtain the best performance for density separation. The mixture was thoroughly stirred with a glass rod for approximately 15 min and the breaker was kept in the ultrasound bath (M2800H-E Ultrasonic Bath, Bransonic) for 3 min. The subsample solution was then allowed to settle for 40 min at room temperature, and the MPs were subsequently extracted from the supernatant.

After density separation, the supernatant was vacuum filtered using a 0.45 µm membrane filter and dried in glass petri dishes at room temperature. The dried filter membranes with remaining materials were stored with a labelled polymer-free weighing paper for identification. Nicolet iS50 FT-IR spectrometer was used for MPs identification. Prior to detecting the MPs, the background spectrum was initially measured, and the optical resolution was set at 4 cm-1 resolution, 64 scans. All suspected particles remaining on the filter were carefully and gently moved to the diamond crystal with a stainless tweezer, followed by the appropriate pressure applied to ensure optical contact between the detector and MP samples. Accordingly, the spectrum for the sample material was analysed and collected. To minimise the interference of attached materials such as sediment clays, calcium carbonate and organic materials on MPs identification, the collected spectrum for each tested particle was only compared with the reference IR spectra of pure polymer materials stored in infrared spectral libraries. Spectra matching rate of over 55% was accepted. For QA/QC purposes, gloves were worn during sample identification, and the sample holder was cleaned using acetone with Kimwipes. Identified MP particles from each sample point were weighed using an analytical balance with an accuracy of 0.01mg (Analytical XSE 105DU) for quantification. Accordingly, the type and concentration of MPs with diameters smaller than 5 mm were recorded.

**Table S1**

Table S1: Model diagnostics and residual variability for Bayesian regression models

|  | Estimate | Est.Error | l-95% CI | u-95% CI | Rhat | Bulk_ESS | Tail_ESS |
| --- | --- | --- | --- | --- | --- | --- | --- |
| HMs | 0.40 | 0.01 | 0.38 | 0.43 | 1.00 | 2696 | 2038 |
| MPs | 1.41 | 0.12 | 1.19 | 1.66 | 1.00 | 3268 | 2619 |
